# Supplementary material for: Prediction of Radiation-Induced Hypothyroidism Using Radiomic Data Analysis Does Not Show Superiority over Standard Normal Tissue Complication Models
Source: MDPI journal article supplement (doi:10.3390/cancers13215584), 2021-11-08
Supplement: s1 [file s1]

# Supplementary Material: Prediction of Radiation-Induced Hypothyroidism Using Radiomic Data Analysis Does Not Show Superiority over Standard Normal Tissue Complication Models

Urszula Smyczynska, Szymon Grabia, Zuzanna Nowicka, Anna Papis-Ubych, Robert Bibik, Tomasz Latusek, Tomasz Rutkowski, Jacek Fijuth, Wojciech Fendler and Bartłomiej Tomasik

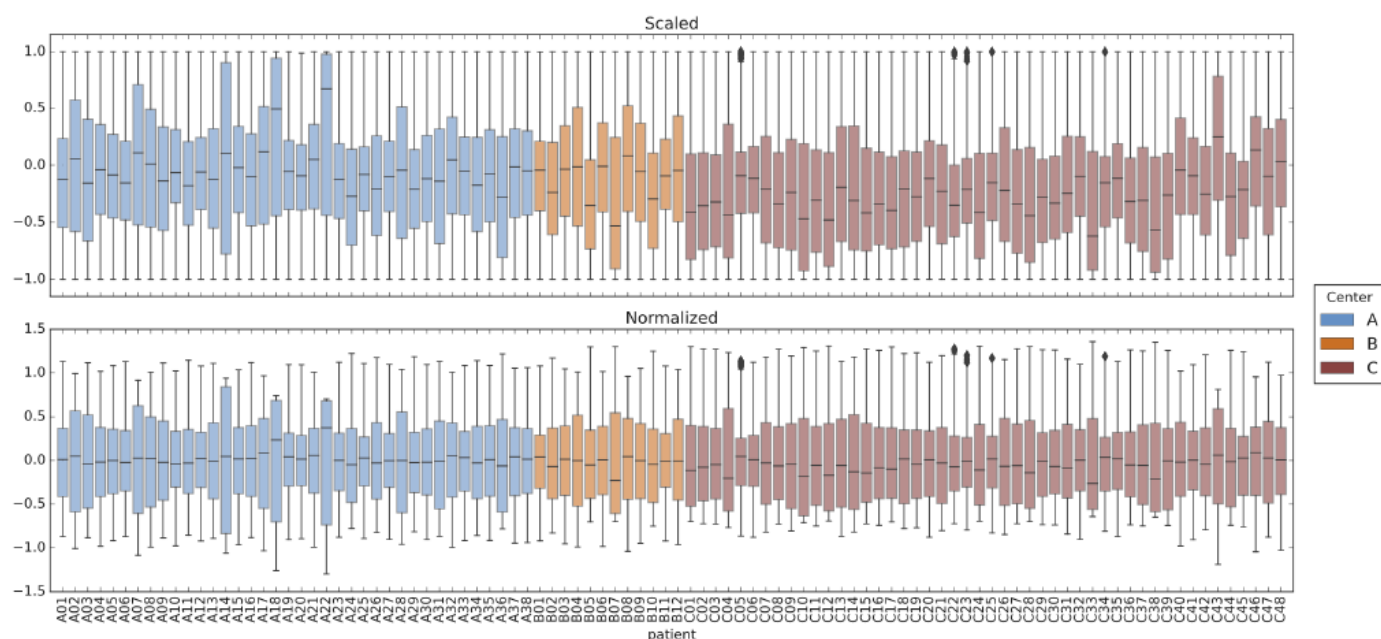

**Figure S1.** Scaling and normalization of radiomic features' values.

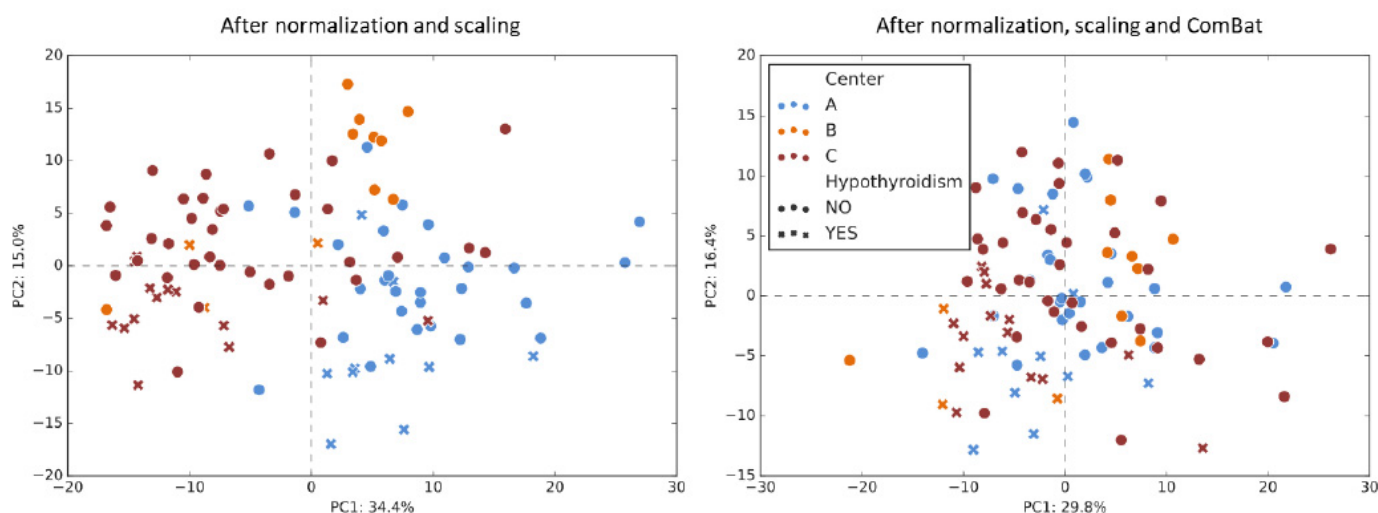

**Figure S2.** Principal component analysis before and after batch effect correction.

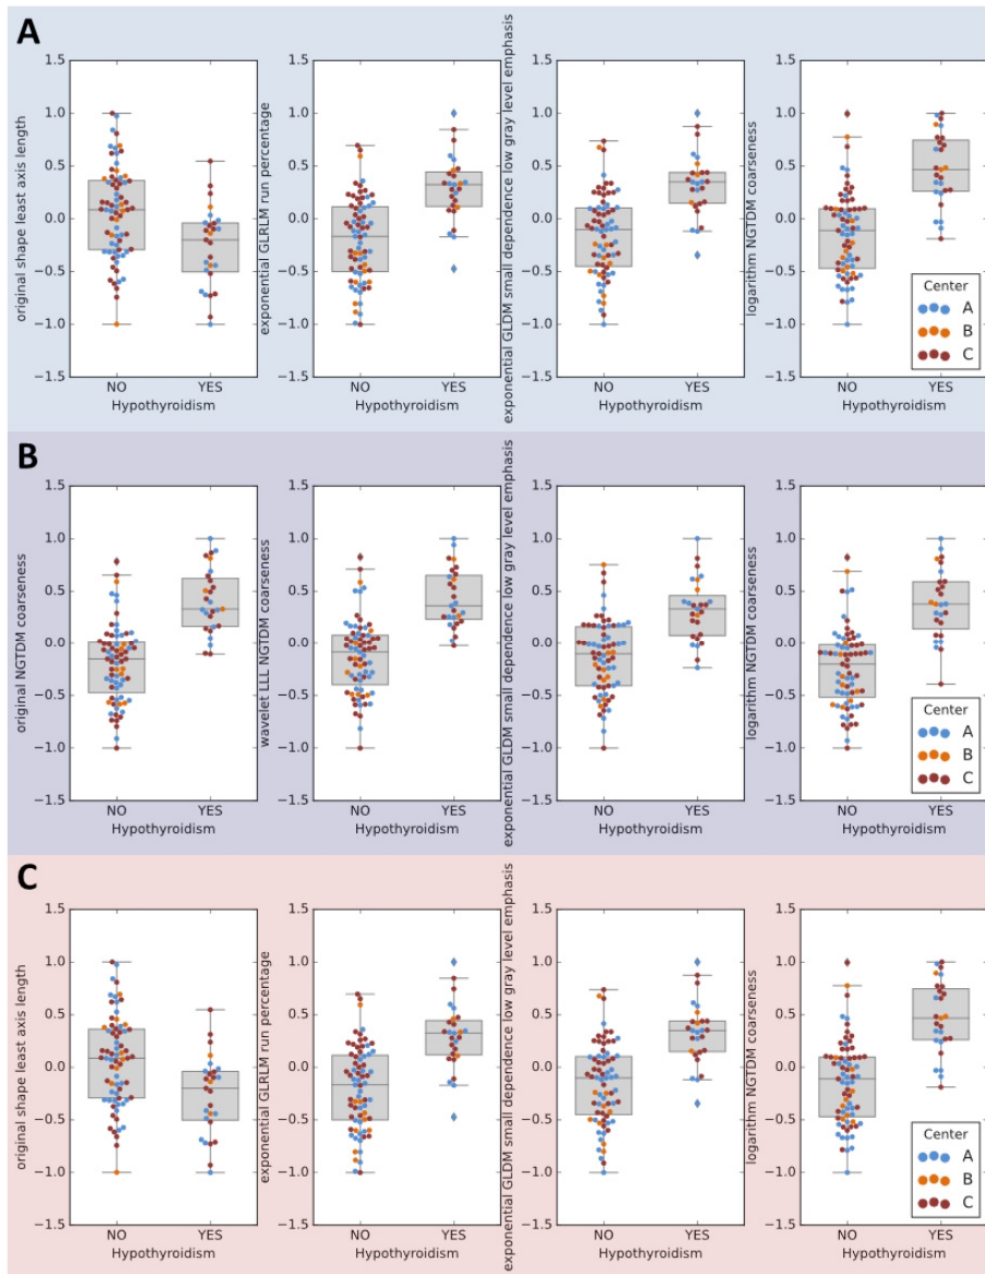

**Figure S3.** Transformed values of radiomic features retained in radiomic-clinical models. (A) variant Ia, (B) variant Ib, (C) variant II.
